# Supplementary material
Source: PubMed Central journal article supplement (PMC5369414)
Supplement: NIHMS851925-supplement-Supplemental_Table_1.pdf [file NIHMS851925-supplement-Supplemental_Table_1.pdf]

**Supplemental table 1. Correlations with disease burden and severity in the corpus callosum.**

|                   | ROI      | EDSS             |       | SDMT             |       | DD               |        | T2LV             |        | T1LV             |        | CE               |       |
|-------------------|----------|------------------|-------|------------------|-------|------------------|--------|------------------|--------|------------------|--------|------------------|-------|
|                   |          | rho <sup>a</sup> | p     | rho <sup>b</sup> | p     | rho <sup>b</sup> | p      | rho <sup>b</sup> | p      | rho <sup>b</sup> | p      | rho <sup>b</sup> | p     |
| MD                | Genu     | 0.07             | 0.732 | -0.51            | 0.005 | 0.80             | <0.001 | 0.13             | 0.514  | 0.27             | 0.171  | 0.12             | 0.526 |
|                   | Body     | 0.36             | 0.055 | -0.46            | 0.013 | 0.78             | <0.001 | 0.29             | 0.140  | 0.35             | 0.070  | 0.02             | 0.927 |
|                   | Splenium | 0.32             | 0.089 | -0.45            | 0.015 | 0.74             | <0.001 | 0.51             | 0.006  | 0.51             | 0.006  | 0.07             | 0.704 |
| FA                | Genu     | -0.17            | 0.379 | 0.57             | 0.001 | -0.70            | <0.001 | -0.28            | 0.145  | -0.36            | 0.063  | -0.31            | 0.096 |
|                   | Body     | -0.36            | 0.052 | 0.52             | 0.004 | -0.67            | <0.001 | -0.19            | 0.336  | -0.24            | 0.209  | -0.10            | 0.624 |
|                   | Splenium | -0.21            | 0.283 | 0.53             | 0.003 | -0.58            | 0.001  | -0.59            | 0.001  | -0.60            | 0.001  | -0.13            | 0.517 |
| AWF               | Genu     | -0.16            | 0.402 | 0.49             | 0.007 | -0.67            | <0.001 | -0.26            | 0.179  | -0.36            | 0.059  | -0.35            | 0.065 |
|                   | Body     | -0.39            | 0.035 | 0.48             | 0.009 | -0.70            | <0.001 | -0.41            | 0.032  | -0.45            | 0.015  | -0.17            | 0.379 |
|                   | Splenium | -0.30            | 0.114 | 0.51             | 0.005 | -0.57            | 0.001  | -0.66            | <0.001 | -0.64            | <0.001 | -0.22            | 0.260 |
| D <sub>axon</sub> | Genu     | -0.22            | 0.243 | 0.37             | 0.045 | -0.23            | 0.229  | -0.30            | 0.125  | -0.35            | 0.065  | -0.38            | 0.041 |
|                   | Body     | -0.05            | 0.799 | 0.32             | 0.090 | -0.12            | 0.532  | -0.11            | 0.562  | -0.17            | 0.398  | -0.22            | 0.257 |

|                |          |       |       |       |       |       |        |       |       |       |        |       |       |
|----------------|----------|-------|-------|-------|-------|-------|--------|-------|-------|-------|--------|-------|-------|
|                | Splenium | -0.21 | 0.272 | 0.47  | 0.009 | -0.25 | 0.197  | -0.60 | 0.001 | -0.61 | 0.001  | -0.23 | 0.224 |
| $D_{e,axial}$  | Genu     | -0.19 | 0.323 | -0.08 | 0.686 | 0.69  | <0.001 | -0.13 | 0.499 | 0.01  | 0.961  | -0.19 | 0.313 |
|                | Body     | 0.10  | 0.621 | -0.09 | 0.647 | 0.65  | <0.001 | 0.10  | 0.625 | 0.17  | 0.393  | -0.13 | 0.495 |
|                | Splenium | 0.17  | 0.386 | 0.12  | 0.546 | 0.54  | 0.003  | -0.16 | 0.429 | -0.13 | 0.497  | -0.05 | 0.784 |
| $D_{e,radial}$ | Genu     | 0.00  | 0.991 | -0.51 | 0.005 | 0.76  | <0.001 | 0.16  | 0.402 | 0.29  | 0.140  | 0.14  | 0.476 |
|                | Body     | 0.28  | 0.144 | -0.47 | 0.011 | 0.74  | <0.001 | 0.22  | 0.259 | 0.29  | 0.137  | 0.02  | 0.925 |
|                | Splenium | 0.12  | 0.528 | -0.44 | 0.017 | 0.65  | <0.001 | 0.48  | 0.009 | 0.51  | 0.006  | 0.07  | 0.718 |
| Tortuosity     | Genu     | -0.17 | 0.379 | 0.52  | 0.004 | -0.60 | 0.001  | -0.28 | 0.146 | -0.35 | 0.071  | -0.36 | 0.053 |
|                | Body     | -0.27 | 0.153 | 0.46  | 0.013 | -0.59 | 0.001  | -0.29 | 0.135 | -0.30 | 0.115  | -0.13 | 0.492 |
|                | Splenium | -0.20 | 0.298 | 0.47  | 0.010 | -0.39 | 0.034  | -0.57 | 0.001 | -0.62 | <0.001 | -0.17 | 0.378 |

<sup>a</sup>Spearman rank correlation coefficients; <sup>b</sup>Pearson correlation coefficients.
